# Supplementary material
Source: PubMed Central journal article supplement (PMC5413925)
Supplement: rspb20170222supp1.pdf [file rspb20170222supp1.pdf]

## Long-term fitness consequences of early environment in a long-lived ungulate Supplementary material

Gabriel Pigeon, Marco Festa-Bianchet, Fanie Pelletier

**Table S1:** Statistics used to test the effect of birth environment covariates on the weaning success of bighorn ewes at Ram Mountain from 1973 to 2014. Fcst/co/t (degrees of freedom) is the statistic from the ANODEV method. P-value is its associated P-value. Adj.P-value is the P-value corrected for multiple testing using the Benjamini & Hochberg method. R<sup>2</sup> describes the proportion of the variance between cohorts explained by the covariate. Delta AICc refers to the difference between the AICc of the model including the covariate and the base model (a negative value indicates a better model than the base model). Interactions with density are noted as “ \* density”, quadratic effects of variables are noted as “(quad)” and models with interactions between early and current environment are noted as “Int”.

| Environmental Covariate     | Fcst/co/t     | P-value | adj.P-value | R <sup>2</sup> | Delta AICc |
|-----------------------------|---------------|---------|-------------|----------------|------------|
| density (Int)               | 36.334 (1,29) | 0.000   | 0           | 0.556          | -32.297    |
| density (quad)              | 8.930 (2,29)  | 0.001   | 0.015       | 0.381          | -29.789    |
| density                     | 14.157 (1,30) | 0.001   | 0.015       | 0.321          | -26.436    |
| temp.spring (Int)           | 6.258 (1,29)  | 0.018   | 0.215       | 0.177          | -13.669    |
| precip.fall (Int)           | 4.464 (1,29)  | 0.043   | 0.407       | 0.133          | -9.482     |
| precip.winter.aft (quad)    | 1.970 (2,29)  | 0.158   | 0.775       | 0.120          | -6.580     |
| precip.winter.bef (quad)    | 1.807 (2,29)  | 0.182   | 0.775       | 0.111          | -5.800     |
| precip.spring (quad)        | 1.693 (2,29)  | 0.202   | 0.775       | 0.105          | -5.244     |
| precip.winter.aft * density | 1.628 (3,28)  | 0.214   | 0.775       | 0.104          | -2.243     |
| temp.spring * density       | 1.606 (3,28)  | 0.219   | 0.775       | 0.103          | -2.166     |
| precip.spring               | 3.396 (1,30)  | 0.075   | 0.589       | 0.102          | -7.009     |
| temp.winter.aft * density   | 1.546 (3,28)  | 0.231   | 0.775       | 0.099          | -1.959     |
| temp.winter.bef * density   | 0.901 (3,28)  | 0.418   | 0.846       | 0.060          | 0.393      |
| temp.fall * density         | 0.899 (3,28)  | 0.418   | 0.846       | 0.060          | 0.401      |
| precip.spring * density     | 0.835 (3,28)  | 0.444   | 0.846       | 0.056          | 0.643      |
| precip.summer (quad)        | 0.828 (2,29)  | 0.447   | 0.846       | 0.054          | -0.760     |
| precip.summer               | 1.569 (1,30)  | 0.220   | 0.775       | 0.050          | -2.397     |
| precip.summer (Int)         | 1.507 (1,29)  | 0.229   | 0.775       | 0.049          | -2.125     |
| temp.winter.aft (quad)      | 0.592 (2,29)  | 0.560   | 0.846       | 0.039          | 0.549      |
| temp.winter.aft             | 1.221 (1,30)  | 0.278   | 0.846       | 0.039          | -1.457     |
| precip.fall (quad)          | 0.574 (2,29)  | 0.570   | 0.846       | 0.038          | 0.656      |
| precip.summer * density     | 0.517 (3,28)  | 0.602   | 0.846       | 0.036          | 1.890      |
| PDO * density               | 0.503 (3,28)  | 0.610   | 0.846       | 0.035          | 1.945      |

**Table S1 (continued):**

| <b>Environmental Covariate</b> | <b>Fcst/co/t</b> | <b>P-value</b> | <b>adj.P-value</b> | <b>R<sup>2</sup></b> | <b>Delta AICc</b> |
|--------------------------------|------------------|----------------|--------------------|----------------------|-------------------|
| temp.winter.bef (quad)         | 0.518 (2,29)     | 0.601          | 0.846              | 0.034                | 0.974             |
| temp.winter.bef                | 1.048 (1,30)     | 0.314          | 0.846              | 0.034                | -0.981            |
| precip.fall                    | 0.980 (1,30)     | 0.330          | 0.846              | 0.032                | -0.792            |
| temp.summer * density          | 0.450 (3,28)     | 0.642          | 0.846              | 0.031                | 2.161             |
| precip.winter.bef              | 0.958 (1,30)     | 0.336          | 0.846              | 0.031                | -0.731            |
| temp.summer (quad)             | 0.458 (2,29)     | 0.637          | 0.846              | 0.031                | 1.316             |
| precip.fall * density          | 0.400 (3,28)     | 0.674          | 0.846              | 0.028                | 2.364             |
| temp.spring (quad)             | 0.399 (2,29)     | 0.675          | 0.846              | 0.027                | 1.656             |
| temp.winter.bef                | 0.675 (1,30)     | 0.418          | 0.846              | 0.023                | 0.075             |
| temp.fall (quad)               | 0.259 (2,29)     | 0.774          | 0.866              | 0.018                | 2.477             |
| temp.fall                      | 0.523 (1,30)     | 0.475          | 0.846              | 0.017                | 0.495             |
| precip.winter.bef * density    | 0.215 (3,28)     | 0.808          | 0.866              | 0.015                | 3.125             |
| PDO (quad)                     | 0.212 (2,29)     | 0.811          | 0.866              | 0.014                | 2.756             |
| temp.winter.aft (Int)          | 0.403 (1,29)     | 0.531          | 0.846              | 0.014                | 0.847             |
| temp.summer                    | 0.361 (1,30)     | 0.552          | 0.846              | 0.012                | 0.959             |
| PDO                            | 0.360 (1,30)     | 0.553          | 0.846              | 0.012                | 0.963             |
| precip.spring (Int)            | 0.249 (1,29)     | 0.622          | 0.846              | 0.009                | 1.333             |
| precip.winter.aft              | 0.164 (1,30)     | 0.688          | 0.846              | 0.005                | 1.531             |
| precip.winter.aft (Int)        | 0.149 (1,29)     | 0.702          | 0.846              | 0.005                | 1.554             |
| PDO (Int)                      | 0.090 (1,29)     | 0.766          | 0.866              | 0.003                | 1.741             |
| precip.winter.bef (Int)        | 0.089 (1,29)     | 0.768          | 0.866              | 0.003                | 1.746             |
| temp.spring                    | 0.029 (1,30)     | 0.867          | 0.905              | 0.001                | 1.930             |
| temp.summer (Int)              | 0.018 (1,29)     | 0.896          | 0.915              | 0.001                | 1.965             |
| temp.fall (Int)                | 0.005 (1,29)     | 0.942          | 0.942              | 0.000                | 2.004             |

**Table S2:** Statistics used to test the effect of birth environment covariates on bighorn ewe survival from 1973 to 2014 using logistic mixed models. Fcst/co/t (degrees of freedom) is the statistic from the ANODEV method. Adj.P-value is the P-value corrected for multiple testing using the Benjamini & Hochberg method. R<sup>2</sup> is the proportion of the variance between cohorts explained by the covariate. Delta AICc refers to the difference between the AICc of the model including the covariate and the base model (a negative value indicates a better model than the base model). Interactions with density are noted as “ \* density”, quadratic effects of variables are noted as “(quad)” and models with interactions between early and current environment are noted as “Int”.

| <b>Environmental Covariate</b>    | <b>Fcst/co/t</b> | <b>P-value</b> | <b>adj.P-value</b> | <b>R<sup>2</sup></b> | <b>Delta AICc</b> |
|-----------------------------------|------------------|----------------|--------------------|----------------------|-------------------|
| birth.precip.winter.aft (quad)    | 2.858 (2,29)     | 0.074          | 0.825              | 0.165                | -2.803            |
| birth.temp.winter.aft * density   | 2.182 (3,28)     | 0.132          | 0.825              | 0.135                | -1.040            |
| birth.temp.summer (quad)          | 2.144 (2,29)     | 0.135          | 0.825              | 0.129                | -1.316            |
| birth.precip.spring (quad)        | 1.660 (2,29)     | 0.208          | 0.825              | 0.103                | -0.232            |
| density (quad)                    | 1.632 (2,29)     | 0.213          | 0.825              | 0.101                | -0.167            |
| birth.temp.winter.aft (quad)      | 1.552 (2,29)     | 0.229          | 0.825              | 0.097                | 0.020             |
| density                           | 3.073 (1,30)     | 0.090          | 0.825              | 0.093                | -1.842            |
| precip.winter.aft (Int)           | 2.807 (1,29)     | 0.105          | 0.825              | 0.088                | -1.534            |
| birth.temp.winter.aft             | 2.705 (1,30)     | 0.110          | 0.825              | 0.083                | -1.419            |
| birth.precip.winter.bef (quad)    | 0.994 (2,29)     | 0.382          | 0.968              | 0.064                | 1.370             |
| birth.precip.spring               | 1.957 (1,30)     | 0.172          | 0.825              | 0.061                | -0.527            |
| birth.temp.summer * density       | 0.837 (3,28)     | 0.444          | 0.968              | 0.056                | 1.915             |
| birth.precip.summer * density     | 0.777 (3,28)     | 0.470          | 0.968              | 0.053                | 2.059             |
| birth.temp.summer                 | 1.636 (1,30)     | 0.211          | 0.825              | 0.052                | -0.132            |
| birth.precip.winter.aft * density | 0.738 (3,28)     | 0.487          | 0.968              | 0.050                | 2.153             |
| birth.precip.winter.bef           | 1.571 (1,30)     | 0.220          | 0.825              | 0.050                | -0.051            |
| temp.fall (Int)                   | 1.420 (1,29)     | 0.243          | 0.825              | 0.047                | 0.072             |
| precip.winter.bef (Int)           | 1.403 (1,29)     | 0.246          | 0.825              | 0.046                | 0.175             |
| birth.temp.fall * density         | 0.652 (3,28)     | 0.529          | 0.968              | 0.044                | 2.363             |
| birth.pdo.annual * density        | 0.588 (3,28)     | 0.562          | 0.968              | 0.040                | 2.520             |
| birth.precip.winter.bef * density | 0.536 (3,28)     | 0.591          | 0.968              | 0.037                | 2.649             |
| birth.precip.spring * density     | 0.513 (3,28)     | 0.604          | 0.968              | 0.035                | 2.707             |

**Table S2 (continued):**

| <b>Environmental Covariate</b>  | <b>Fcst/co/t</b> | <b>P-value</b> | <b>adj.P-value</b> | <b>R<sup>2</sup></b> | <b>Delta AICc</b> |
|---------------------------------|------------------|----------------|--------------------|----------------------|-------------------|
| temp.winter.bef (Int)           | 0.860 (1,29)     | 0.361          | 0.968              | 0.029                | 0.821             |
| birth.precip.summer (quad)      | 0.376 (2,29)     | 0.690          | 0.968              | 0.025                | 2.985             |
| birth.precip.winter.aft         | 0.613 (1,30)     | 0.440          | 0.968              | 0.020                | 1.183             |
| precip.summer (Int)             | 0.564 (1,29)     | 0.459          | 0.968              | 0.019                | 1.230             |
| birth.precip.fall * density     | 0.249 (3,28)     | 0.781          | 0.968              | 0.017                | 3.379             |
| birth.precip.summer             | 0.490 (1,30)     | 0.489          | 0.968              | 0.016                | 1.348             |
| precip.fall (Int)               | 0.436 (1,29)     | 0.514          | 0.968              | 0.015                | 1.421             |
| birth.precip.fall (quad)        | 0.184 (2,29)     | 0.833          | 0.968              | 0.013                | 3.513             |
| birth.precip.fall               | 0.365 (1,30)     | 0.550          | 0.968              | 0.012                | 1.516             |
| birth.temp.spring * density     | 0.162 (3,28)     | 0.851          | 0.968              | 0.011                | 3.607             |
| birth.temp.fall (quad)          | 0.137 (2,29)     | 0.872          | 0.968              | 0.009                | 3.643             |
| fem (Int)                       | 0.254 (1,29)     | 0.618          | 0.968              | 0.009                | 1.697             |
| birth.temp.spring (quad)        | 0.111 (2,29)     | 0.895          | 0.968              | 0.008                | 3.717             |
| birth.pdo.annual (quad)         | 0.102 (2,29)     | 0.903          | 0.968              | 0.007                | 3.743             |
| birth.pdo.annual                | 0.184 (1,30)     | 0.671          | 0.968              | 0.006                | 1.763             |
| temp.summer (Int)               | 0.169 (1,29)     | 0.684          | 0.968              | 0.006                | 1.799             |
| birth.temp.winter.bef * density | 0.068 (3,28)     | 0.934          | 0.968              | 0.005                | 3.856             |
| temp.spring (Int)               | 0.086 (1,29)     | 0.772          | 0.968              | 0.003                | 1.898             |
| precip.spring (Int)             | 0.073(1,29)      | 0.788          | 0.968              | 0.003                | 1.923             |
| birth.temp.winter.bef (quad)    | 0.035 (2,29)     | 0.966          | 0.968              | 0.002                | 3.934             |
| temp.winter.aft (Int)           | 0.048 (1,29)     | 0.828          | 0.968              | 0.002                | 1.957             |
| birth.temp.fall                 | 0.046 (1,30)     | 0.831          | 0.968              | 0.002                | 1.951             |
| birth.temp.spring               | 0.017 (1,30)     | 0.899          | 0.968              | 0.001                | 1.992             |
| birth.temp.winter.bef           | 0.010 (1,30)     | 0.923          | 0.968              | 0.000                | 2.002             |
| pdo.annual (Int)                | 0.002 (1,29)     | 0.968          | 0.968              | 0.000                | 2.018             |

**Table S3:** Statistics used to test the effect of birth environment covariates on bighorn ewe survival from 1973 to 2014 using time-dependent cox proportional models. Fcst/co/t (degrees of freedom) is the statistic from the ANODEV method. R<sup>2</sup> is the proportion of the variance between cohorts explained by the covariate. Delta AICc refers to the difference between the AICc of the model including the covariate and the base model (a negative value indicates a better model than the base model). Interactions with density are noted as “ \* density”, quadratic effects of variables are noted as “(quad)” and models with interactions between early and current environment are noted as “Int”.

| <b>Environmental Covariate</b> | <b>Fcst/co/t</b> | <b>P-value</b> | <b>adj.P-value</b> | <b>R<sup>2</sup></b> | <b>Delta AICc</b> |
|--------------------------------|------------------|----------------|--------------------|----------------------|-------------------|
| density                        | 11.157 (1,30)    | 0.002          | 0.106              | 0.271                | -14.188           |
| density (quad)                 | 5.585 (2,29)     | 0.009          | 0.209              | 0.278                | -12.600           |
| precip.spring                  | 4.774 (1,30)     | 0.037          | 0.577              | 0.137                | -6.197            |
| precip.spring (quad)           | 2.638 (2,29)     | 0.089          | 0.862              | 0.154                | -5.185            |
| precip.winter.aft (quad)       | 2.303 (2,29)     | 0.118          | 0.862              | 0.137                | -4.178            |
| temp.winter.aft                | 2.420 (1,30)     | 0.130          | 0.862              | 0.075                | -2.456            |
| temp.winter.aft *density       | 2.122 (3,28)     | 0.139          | 0.862              | 0.132                | -1.717            |
| precip.winter.aft (Int)        | 2.223 (1,29)     | 0.147          | 0.862              | 0.071                | -2.179            |
| precip.winter.bef              | 2.007 (1,30)     | 0.167          | 0.871              | 0.063                | -1.743            |
| temp.winter.aft (quad)         | 1.306 (2,29)     | 0.286          | 0.962              | 0.083                | -0.928            |
| precip.winter.bef (Int)        | 1.144 (1,29)     | 0.294          | 0.962              | 0.038                | -0.166            |
| precip.spring (Int)            | 0.892 (1,29)     | 0.353          | 0.962              | 0.030                | 0.468             |
| precip.summer *density         | 1.076 (3,28)     | 0.355          | 0.962              | 0.071                | 0.906             |
| precip.winter.bef (quad)       | 1.040 (2,29)     | 0.366          | 0.962              | 0.067                | 0.011             |
| temp.fall (Int)                | 0.708 (1,29)     | 0.407          | 0.962              | 0.024                | 0.641             |
| temp.winter.bef (Int)          | 0.677 (1,29)     | 0.417          | 0.962              | 0.023                | 0.633             |
| temp.fall *density             | 0.663 (3,28)     | 0.523          | 0.962              | 0.045                | 2.043             |
| precip.summer (Int)            | 0.406 (1,29)     | 0.529          | 0.962              | 0.014                | 1.180             |
| precip.winter.aft *density     | 0.645 (3,28)     | 0.532          | 0.962              | 0.044                | 2.096             |
| temp.summer (quad)             | 0.626 (3,28)     | 0.542          | 0.962              | 0.041                | 1.535             |
| precip.fall                    | 0.368 (1,30)     | 0.549          | 0.962              | 0.012                | 1.280             |
| precip.summer (quad)           | 0.602 (2,29)     | 0.554          | 0.962              | 0.040                | 1.626             |
| precip.winter.bef *density     | 0.579 (3,28)     | 0.567          | 0.962              | 0.040                | 2.285             |

**Table S3 (continued):**

| <b>Environmental Covariate</b> | <b>Fcst/co/t</b> | <b>P-value</b> | <b>adj.P-value</b> | <b>R<sup>2</sup></b> | <b>Delta AICc</b> |
|--------------------------------|------------------|----------------|--------------------|----------------------|-------------------|
| precip.spring *density         | 0.576 (3,28)     | 0.568          | 0.962              | 0.040                | 2.291             |
| density (Int)                  | 0.259 (1,29)     | 0.614          | 0.962              | 0.009                | 1.632             |
| precip.fall (Int)              | 0.237 (1,29)     | 0.630          | 0.962              | 0.008                | 1.554             |
| temp.summer                    | 0.237 (1,30)     | 0.630          | 0.962              | 0.008                | 1.535             |
| temp.summer *density           | 0.466 (3,28)     | 0.632          | 0.962              | 0.032                | 2.610             |
| pdo.annual                     | 0.196 (1,30)     | 0.661          | 0.962              | 0.006                | 1.615             |
| temp.winter.bef                | 0.195 (1,30)     | 0.662          | 0.962              | 0.006                | 1.617             |
| pdo.annual *density            | 0.415 (3,28)     | 0.664          | 0.962              | 0.029                | 2.758             |
| precip.summer                  | 0.132 (1,30)     | 0.719          | 0.962              | 0.004                | 1.741             |
| pdo.annual (Int)               | 0.124 (1,29)     | 0.727          | 0.962              | 0.004                | 1.754             |
| precip.fall *density           | 0.303 (3,28)     | 0.741          | 0.962              | 0.021                | 3.090             |
| temp.winter.bef (quad)         | 0.253 (2,29)     | 0.778          | 0.962              | 0.017                | 2.983             |
| temp.fall                      | 0.068 (1,30)     | 0.796          | 0.962              | 0.002                | 1.868             |
| precip.fall (quad)             | 0.190 (2,29)     | 0.828          | 0.962              | 0.013                | 3.234             |
| temp.spring (quad)             | 0.174 (2,29)     | 0.841          | 0.962              | 0.012                | 3.301             |
| precip.winter.aft              | 0.041 (1,30)     | 0.842          | 0.962              | 0.001                | 1.922             |
| temp.summer (Int)              | 0.036 (1,29)     | 0.852          | 0.962              | 0.001                | 1.939             |
| temp.winter.bef *density       | 0.130 (3,28)     | 0.878          | 0.962              | 0.009                | 3.610             |
| temp.spring *density           | 0.130 (3,28)     | 0.879          | 0.962              | 0.009                | 3.612             |
| pdo.annual (quad)              | 0.120 (2,29)     | 0.887          | 0.962              | 0.008                | 3.516             |
| temp.winter.aft (Int)          | 0.012 (1,29)     | 0.914          | 0.962              | 0.000                | 1.985             |
| temp.spring (Int)              | 0.010 (1,29)     | 0.921          | 0.962              | 0.000                | 1.987             |
| temp.spring                    | 0.005 (1,30)     | 0.944          | 0.962              | 0.000                | 1.993             |
| temp.fall (quad)               | 0.035 (2,29)     | 0.966          | 0.962              | 0.002                | 3.864             |

**Figure S1:** Predicted reproduction of bighorn ewes by a) cohort and b) individual according to current density. Birth density is represented by the color of the curves. All density values were standardized.

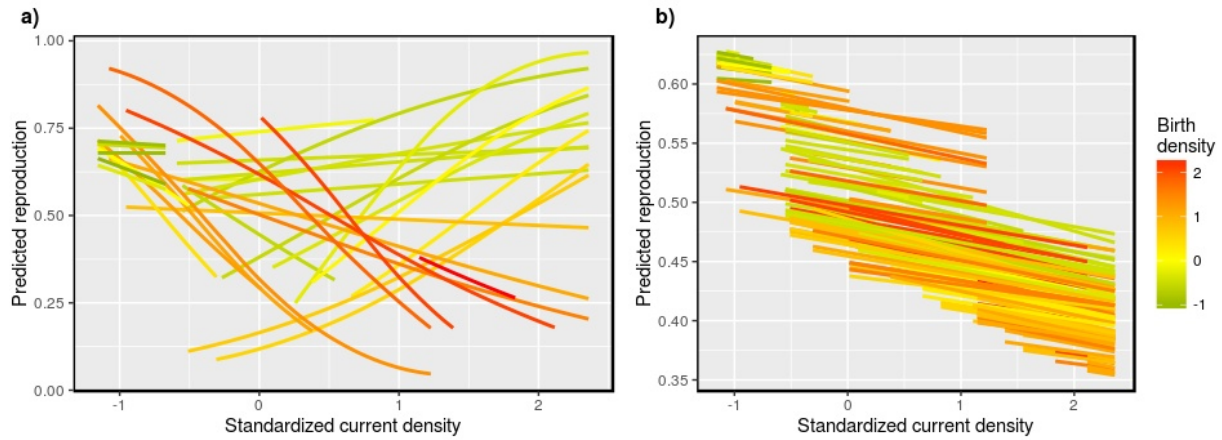

**Figure S2:** Number of ewes at Ram Mountain according to current and birth density. Dot size is proportional to sample size.

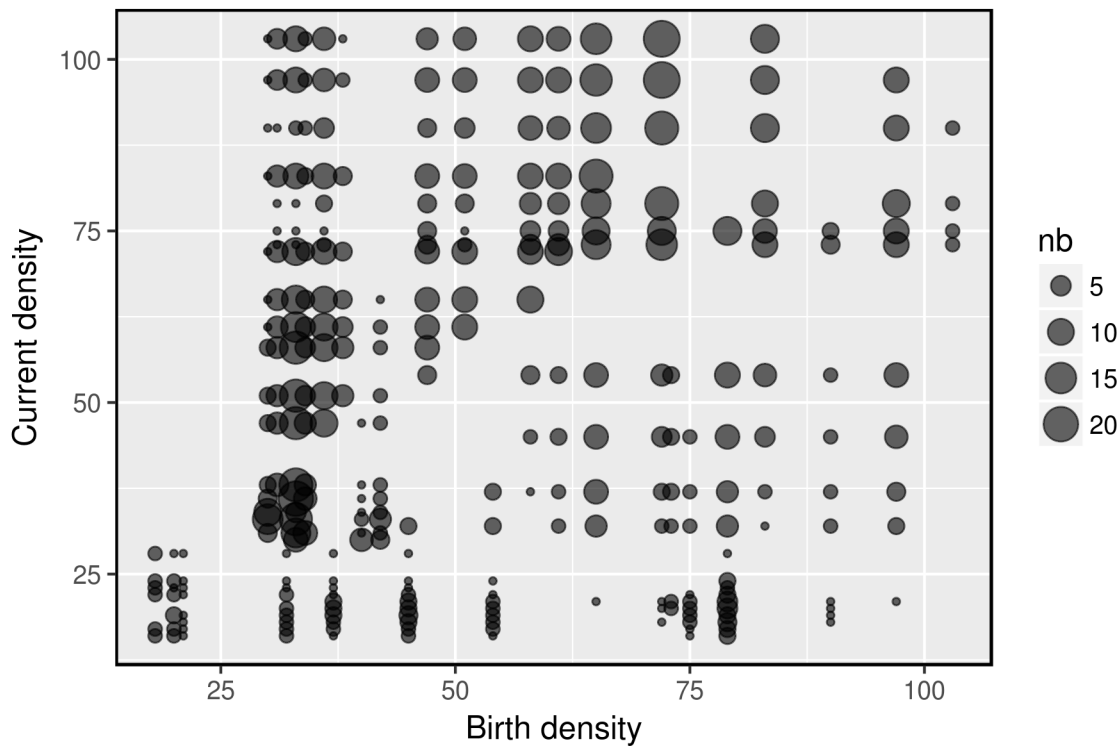

**Table S4:** Additional information about cohorts of bighorn ewes at Ram Mountain. Number of individual per cohort (N); length of time the cohort was present in the population in years (Present for); mean number of years a ewe was observed (Mean(obs/id); standard deviation of the number of observation per individual (Mean(obs/id)).

| <b>Cohort</b> | <b>N</b> | <b>Present for</b> | <b>Mean(obs/id)</b> | <b>Sd(obs/id)</b> |
|---------------|----------|--------------------|---------------------|-------------------|
| 1973          | 6        | 15                 | 10.47               | 4.88              |
| 1974          | 7        | 10                 | 5.17                | 3.23              |
| 1975          | 8        | 17                 | 11.61               | 6.11              |
| 1976          | 12       | 10                 | 4.35                | 2.84              |
| 1977          | 6        | 17                 | 10.5                | 5.99              |
| 1978          | 11       | 19                 | 12.23               | 4.4               |
| 1979          | 8        | 15                 | 10.54               | 3.78              |
| 1980          | 7        | 13                 | 8.75                | 2.53              |
| 1981          | 7        | 16                 | 11.09               | 2.58              |
| 1982          | 11       | 15                 | 10.4                | 2.8               |
| 1983          | 6        | 10                 | 6.52                | 2.08              |
| 1984          | 8        | 14                 | 10.85               | 3.08              |
| 1985          | 9        | 12                 | 8.39                | 2.03              |
| 1986          | 10       | 14                 | 9.92                | 2.56              |
| 1987          | 11       | 14                 | 9.59                | 3.28              |
| 1988          | 18       | 14                 | 10.05               | 2.83              |
| 1989          | 22       | 15                 | 7.89                | 2.89              |
| 1990          | 12       | 11                 | 7.26                | 1.98              |
| 1991          | 9        | 11                 | 7.61                | 2.17              |
| 1992          | 2        | 5                  | 4                   | 0                 |
| 1993          | 3        | 6                  | 4.64                | 1.21              |
| 1994          | 4        | 11                 | 7.42                | 3.15              |
| 1995          | 12       | 17                 | 10.59               | 4.93              |
| 1996          | 3        | 7                  | 5.4                 | 1.24              |
| 1997          | 2        | 11                 | 8.76                | 1.52              |
| 1998          | 3        | 11                 | 8.05                | 2.57              |
| 1999          | 4        | 13                 | 9                   | 3.22              |
| 2000          | 6        | 12                 | 7.21                | 4.6               |
| 2001          | 2        | 13                 | 10                  | 2.91              |
| 2002          | 1        | 10                 | 9                   | 0                 |
| 2003          | 3        | 11                 | 7.88                | 2.99              |
| 2004          | 2        | 10                 | 8.12                | 1.02              |
